# Supplementary material for: Genome-wide association study of seed coat color in sesame (Sesamum indicum L.)
Source: PLoS One. 2021 May 21;16(5):e0251526. doi: 10.1371/journal.pone.0251526 (PMC8139513; doi:10.1371/journal.pone.0251526)
Supplement: S1 Table — (XLSX) [file pone.0251526.s006.xlsx]

## Sheet: S1 Table
S1 Table Descriptive statistics of seed coat color across 12 environments
Trait	Environment	Mean	Std Dev	CV(%)	Min	Max	Shapiro-Wilk test	Heritability
L-value	2012SY	46.96	9.82	20.91	16.06	61.48	W=0.85 P<0.01	82.94
	2013NY	46.79	6.59	14.08	19.91	58	W=0.89 P<0.01	85.81
	2013PY	46.58	8.48	18.2	17.75	59.31	W=0.89 P<0.01	89.28
	2013SQ	50.23	7.23	14.39	20.25	60.85	W=0.86 P<0.01	88.97
	2013SY	46.85	9.45	20.81	14.19	60.91	W=0.85 P<0.01	80.47
	2014NY	47.67	8.73	18.31	17.61	60.79	W=0.89 P<0.01	83.95
	2014PY	47.75	8.7	18.22	17.33	60.88	W=0.87 P<0.01	79.09
	2014SQ	50.07	8.61	17.19	18.46	61.72	W=0.81 P<0.01	92.87
	2014SY	45.59	10.46	22.94	10.53	60.77	W=0.87 P<0.01	86.71
	2015PY	50.91	8.51	16.72	18.09	62.44	W=0.82 P<0.01	94.98
	2015SY	46.45	8.6	18.52	16.04	59.95	W=0.86 P<0.01	90.93
	2016PY	50.65	8.75	17.27	17.27	63.4	W=0.83 P<0.01	88.46
	BLUP	48.55	7.24	14.91	21.19	59.02	W=0.85 P<0.01
a-value	2012SY	4.93	1.79	36.37	0.08	9.47	W=0.89 P<0.01	82.54
	2013NY	5.27	1.31	24.8	0.52	9.32	W=0.94 P<0.01	88.85
	2013PY	5.56	1.67	30.06	1.46	10.38	W=0.93 P<0.01	89.01
	2013SQ	5.1	1.22	24.07	0.67	8.11	W=0.93 P<0.01	87.12
	2013SY	4.86	1.75	36.07	0.14	9.48	W=0.87 P<0.01	87.55
	2014NY	5.15	1.58	30.72	0.3	8.81	W=0.90 P<0.01	81.91
	2014PY	5.1	1.49	29.29	0.1	9.48	W=0.94 P<0.01	76.7
	2014SQ	4.84	1.44	29.71	0.13	8.53	W=0.87 P<0.01	83.28
	2014SY	5.05	1.89	37.4	0.12	10.55	W=0.92 P<0.01	81.37
	2015PY	5.22	1.76	33.71	0.71	11.08	W=0.84 P<0.01	94.99
	2015SY	5.14	1.7	33.08	0.16	10.81	W=0.88 P<0.01	90.95
	2016PY	5.25	1.78	33.98	0.19	11.22	W=0.84 P<0.01	89.94
	BLUP	5.18	1.26	24.39	0.87	8.39	W=0.89 P<0.01
b-value	2012SY	12.4	2.9	23.37	0.09	16.7	W=0.68 P<0.01	82.04
	2013NY	12.9	2.12	16.5	0.89	16.6	W=0.75 P<0.01	83.75
	2013PY	13.2	2.74	20.76	0.23	18.25	W=0.77 P<0.01	84
	2013SQ	13.22	2.05	15.51	1.34	16.26	W=0.69 P<0.01	86.74
	2013SY	12.3	2.77	22.49	-0.17	16.83	W=0.72 P<0.01	85.39
	2014NY	12.39	2.45	19.79	0.33	16.26	W=0.72 P<0.01	86.16
	2014PY	12.57	2.3	18.3	0.05	16.44	W=0.74 P<0.01	70.23
	2014SQ	12.79	2.42	18.92	0.27	17.51	W=0.69 P<0.01	74.48
	2014SY	12.13	2.97	24.5	-0.47	18.4	W=0.80 P<0.01	84.11
	2015PY	14.37	2.57	17.86	0.92	18.6	W=0.69 P<0.01	90.9
	2015SY	12.51	2.54	20.32	-0.35	16.46	W=0.71 P<0.01	85.43
	2016PY	13.88	2.63	18.97	-0.32	18.75	W=0.69 P<0.01	89.42
	BLUP	13.34	1.91	14.35	2.28	16.68	W=0.63 P<0.01
Std Dev: standard deviation; CV: Coefficient of variation
